# Supplementary material for: Close the High Seas to Fishing?
Source: PLOS journal article supplement (doi:10.1371/journal.pbio.1001826), 2014-03-25

# **Close the High Seas to Fishing?** Crow White and Christopher Costello

**Figure S5**

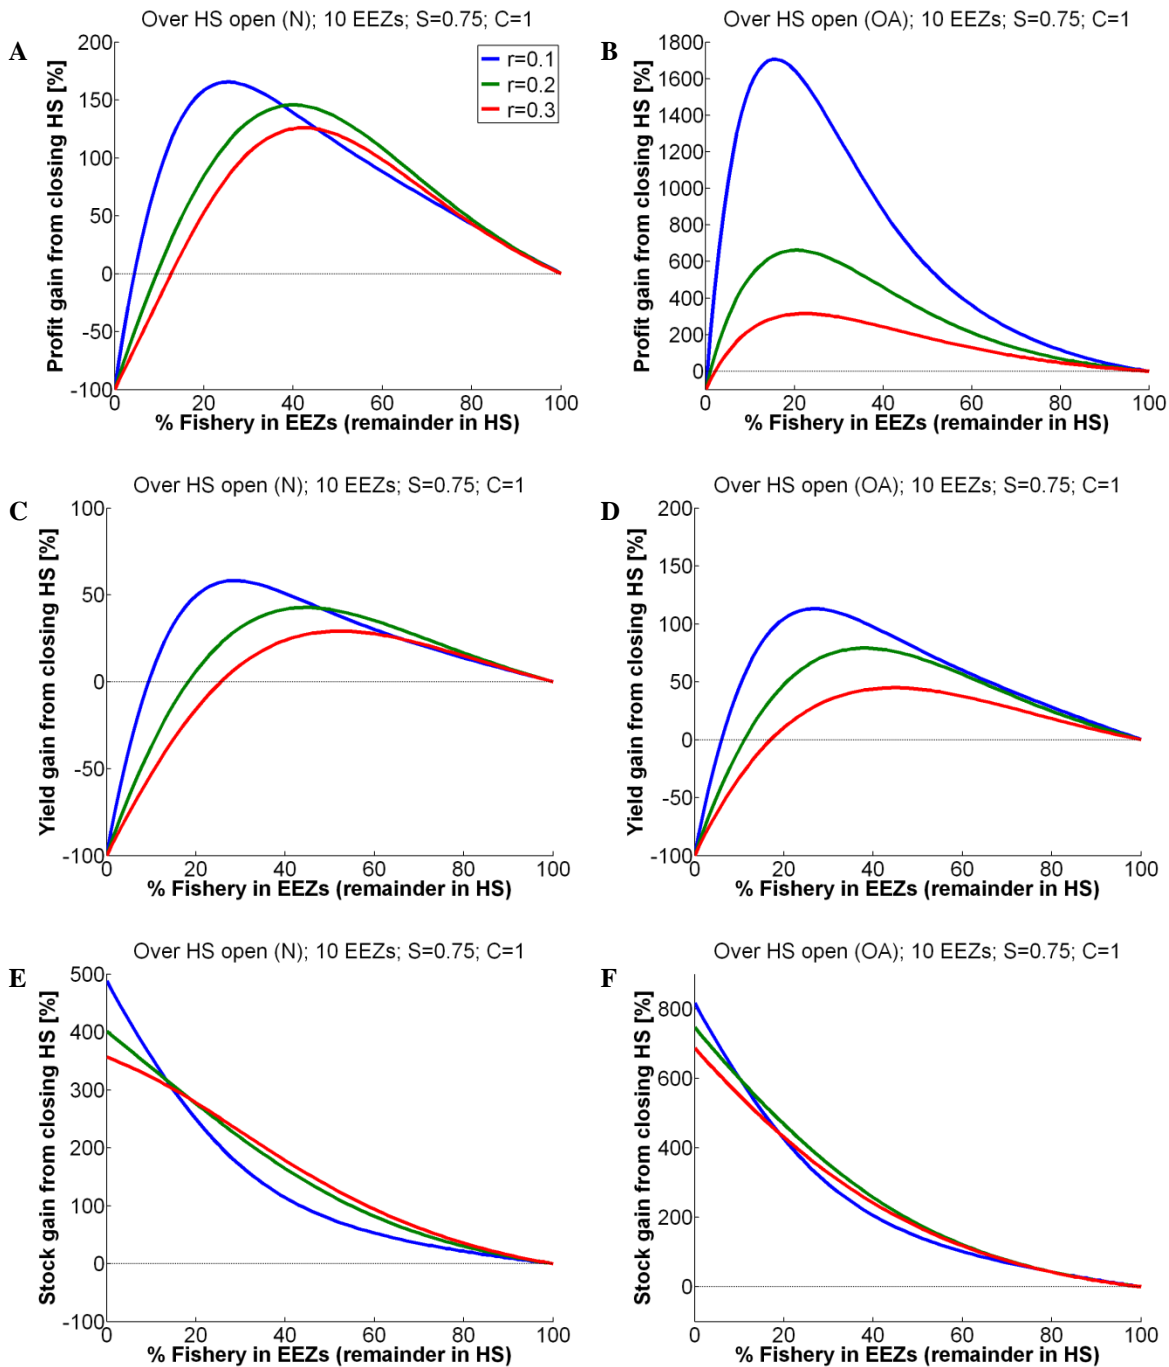

Supplement: S5 (10.1371/journal.pbio.1001826.s005) [file journal.pbio.1001826.s005]
